# Supplementary material for: Income-Related Gaps in Early Child Cognitive Development: Why Are They Larger in the United States Than in the United Kingdom, Australia, and Canada?
Source: PubMed Central journal article supplement (PMC6513808; doi:10.1007/s13524-018-0738-8), 2018-11-28
Supplement: 13524_2018_738_MOESM1_ESM.pdf [file 13524_2018_738_MOESM1_ESM.pdf]

**ONLINE DATA APPENDIX to Income-Related Gaps in Early Child Cognitive Development: Why Are They Larger in the United States Than in the United Kingdom, Australia, and Canada?**

**Table OA1. Sample sizes**

|    | Income group |      |      |      |      |
|----|--------------|------|------|------|------|
|    | Q1           | Q2   | Q3   | Q4   | Q5   |
| US | 1679         | 1680 | 1663 | 1675 | 1673 |
| UK | 2443         | 2371 | 2641 | 2794 | 1513 |
| AU | 712          | 945  | 1053 | 800  | 389  |
| CA | 445          | 946  | 1308 | 1087 | 512  |

**Table OA2. Sample estimates**

|                                                | Means by income group |         |         |         |         | Gaps within countries (ref = Q3) [ $D_{c,q}$ ] |           |           |           | Difference in gaps between US and other countries [ $DD_{c,q}$ ] |         |           |           | Overall summary        |                      |
|------------------------------------------------|-----------------------|---------|---------|---------|---------|------------------------------------------------|-----------|-----------|-----------|------------------------------------------------------------------|---------|-----------|-----------|------------------------|----------------------|
|                                                | Q1                    | Q2      | Q3      | Q4      | Q5      | Q1-Q3                                          | Q2-Q3     | Q4-Q3     | Q5-Q3     | Q1-Q3                                                            | Q2-Q3   | Q4-Q3     | Q5-Q3     | Gap w/in country Q5-Q1 | US diff in gap Q5-Q1 |
| <b>Standardized early literacy test scores</b> |                       |         |         |         |         |                                                |           |           |           |                                                                  |         |           |           |                        |                      |
| US                                             | -0.660                | -0.345  | -0.012  | 0.363   | 0.596   | -0.648                                         | -0.333    | 0.375     | 0.608     | -                                                                | -       | -         | -         | 1.256                  | -                    |
|                                                | (0.055)               | (0.042) | (0.040) | (0.041) | (0.050) | (0.068)**                                      | (0.058)** | (0.057)** | (0.064)** |                                                                  |         |           |           | (0.074)**              |                      |
| UK                                             | -0.586                | -0.179  | 0.104   | 0.284   | 0.501   | -0.690                                         | -0.282    | 0.180     | 0.398     | 0.042                                                            | -0.051  | 0.194     | 0.210     | 1.087                  | 0.169                |
|                                                | (0.047)               | (0.030) | (0.023) | (0.023) | (0.035) | (0.052)**                                      | (0.037)** | (0.032)** | (0.042)** | (0.086)                                                          | (0.069) | (0.066)** | (0.076)** | (0.059)**              | (0.095)+             |
| AU                                             | -0.384                | -0.133  | 0.081   | 0.227   | 0.320   | -0.465                                         | -0.214    | 0.145     | 0.239     | -0.183                                                           | -0.119  | 0.229     | 0.369     | 0.704                  | 0.551                |
|                                                | (0.056)               | (0.040) | (0.031) | (0.038) | (0.048) | (0.065)**                                      | (0.051)** | (0.049)** | (0.057)** | (0.094)+                                                         | (0.077) | (0.076)** | (0.086)** | (0.074)**              | (0.105)**            |
| CA                                             | -0.307                | -0.229  | -0.033  | 0.185   | 0.316   | -0.274                                         | -0.196    | 0.218     | 0.350     | -0.374                                                           | -0.137  | 0.157     | 0.258     | 0.623                  | 0.632                |
|                                                | (0.065)               | (0.054) | (0.059) | (0.047) | (0.084) | (0.088)**                                      | (0.080)*  | (0.076)** | (0.103)** | (0.111)**                                                        | (0.099) | (0.095)+  | (0.121)*  | (0.106)**              | (0.130)**            |

|                                                                      | Means by income group |         |         |         |         | Gaps within countries (ref = Q3) [ $D_{c,q}$ ] |           |           |           | Difference in gaps between US and other countries [ $DD_{c,q}$ ] |          |           |           | Overall summary  |                |
|----------------------------------------------------------------------|-----------------------|---------|---------|---------|---------|------------------------------------------------|-----------|-----------|-----------|------------------------------------------------------------------|----------|-----------|-----------|------------------|----------------|
|                                                                      | Q1                    | Q2      | Q3      | Q4      | Q5      | Q1-Q3                                          | Q2-Q3     | Q4-Q3     | Q5-Q3     | Q1-Q3                                                            | Q2-Q3    | Q4-Q3     | Q5-Q3     | Gap w/in country | US diff in gap |
|                                                                      |                       |         |         |         |         |                                                |           |           |           |                                                                  |          |           |           | Q5-Q1            | Q5-Q1          |
| <b>Mothers with college degree (proportion)</b>                      |                       |         |         |         |         |                                                |           |           |           |                                                                  |          |           |           |                  |                |
| US                                                                   | 0.014                 | 0.061   | 0.132   | 0.298   | 0.609   | -0.119                                         | -0.071    | 0.166     | 0.477     | -                                                                | -        | -         | -         | 0.595            | -              |
|                                                                      | (0.004)               | (0.009) | (0.014) | (0.018) | (0.019) | (0.014)**                                      | (0.016)** | (0.022)** | (0.023)** |                                                                  |          |           |           | (0.019)**        |                |
| UK                                                                   | 0.005                 | 0.030   | 0.104   | 0.269   | 0.569   | -0.099                                         | -0.074    | 0.165     | 0.465     | -0.019                                                           | 0.003    | 0.001     | 0.012     | 0.564            | 0.031          |
|                                                                      | (0.001)               | (0.004) | (0.007) | (0.014) | (0.021) | (0.007)**                                      | (0.008)** | (0.016)** | (0.022)** | (0.016)                                                          | (0.018)  | (0.027)   | (0.032)   | (0.021)**        | (0.028)        |
| AU                                                                   | 0.089                 | 0.140   | 0.218   | 0.376   | 0.633   | -0.129                                         | -0.078    | 0.159     | 0.415     | 0.010                                                            | 0.006    | 0.007     | 0.062     | 0.544            | 0.052          |
|                                                                      | (0.011)               | (0.011) | (0.012) | (0.017) | (0.023) | (0.016)**                                      | (0.016)** | (0.020)** | (0.025)** | (0.022)                                                          | (0.023)  | (0.030)   | (0.034)+  | (0.025)**        | (0.032)        |
| CA                                                                   | 0.031                 | 0.065   | 0.117   | 0.250   | 0.535   | -0.086                                         | -0.052    | 0.133     | 0.417     | -0.033                                                           | -0.019   | 0.032     | 0.059     | 0.503            | 0.092          |
|                                                                      | (0.012)               | (0.015) | (0.014) | (0.023) | (0.036) | (0.018)**                                      | (0.021)*  | (0.026)** | (0.038)** | (0.023)                                                          | (0.026)  | (0.034)   | (0.045)   | (0.038)**        | (0.042)*       |
| <b>Mothers with a high school diploma or less (proportion)</b>       |                       |         |         |         |         |                                                |           |           |           |                                                                  |          |           |           |                  |                |
| US                                                                   | 0.784                 | 0.602   | 0.459   | 0.272   | 0.123   | 0.325                                          | 0.142     | -0.187    | -0.336    | -                                                                | -        | -         | -         | -0.661           | -              |
|                                                                      | (0.023)               | (0.024) | (0.021) | (0.019) | (0.013) | (0.031)**                                      | (0.032)** | (0.029)** | (0.025)** |                                                                  |          |           |           | (0.026)**        |                |
| UK                                                                   | 0.868                 | 0.688   | 0.505   | 0.298   | 0.118   | 0.363                                          | 0.183     | -0.207    | -0.387    | -0.038                                                           | -0.041   | 0.020     | 0.051     | -0.749           | 0.088          |
|                                                                      | (0.009)               | (0.012) | (0.012) | (0.014) | (0.010) | (0.015)**                                      | (0.017)** | (0.019)** | (0.016)** | (0.034)                                                          | (0.036)  | (0.034)   | (0.030)+  | (0.013)**        | (0.030)**      |
| AU                                                                   | 0.792                 | 0.691   | 0.587   | 0.434   | 0.195   | 0.205                                          | 0.104     | -0.153    | -0.392    | 0.120                                                            | 0.039    | -0.034    | 0.056     | -0.597           | -0.065         |
|                                                                      | (0.016)               | (0.016) | (0.015) | (0.017) | (0.020) | (0.022)**                                      | (0.021)** | (0.022)** | (0.025)** | (0.038)**                                                        | (0.039)  | (0.036)   | (0.035)   | (0.026)**        | (0.037)+       |
| CA                                                                   | 0.635                 | 0.438   | 0.328   | 0.171   | 0.098   | 0.307                                          | 0.111     | -0.156    | -0.230    | 0.018                                                            | 0.032    | -0.031    | -0.106    | -0.537           | -0.124         |
|                                                                      | (0.038)               | (0.027) | (0.024) | (0.019) | (0.023) | (0.045)**                                      | (0.036)** | (0.031)** | (0.033)** | (0.054)                                                          | (0.048)  | (0.042)   | (0.042)*  | (0.044)**        | (0.051)*       |
| <b>Two resident biological parents at child's age 5 (proportion)</b> |                       |         |         |         |         |                                                |           |           |           |                                                                  |          |           |           |                  |                |
| US                                                                   | 0.382                 | 0.546   | 0.656   | 0.798   | 0.862   | -0.274                                         | -0.110    | 0.142     | 0.206     | -                                                                | -        | -         | -         | 0.480            | -              |
|                                                                      | (0.026)               | (0.027) | (0.024) | (0.018) | (0.018) | (0.036)**                                      | (0.036)** | (0.030)** | (0.030)** |                                                                  |          |           |           | (0.031)**        |                |
| UK                                                                   | 0.369                 | 0.637   | 0.846   | 0.941   | 0.980   | -0.477                                         | -0.209    | 0.095     | 0.134     | 0.203                                                            | 0.099    | 0.046     | 0.072     | 0.610            | -0.130         |
|                                                                      | (0.026)               | (0.018) | (0.016) | (0.012) | (0.010) | (0.031)**                                      | (0.024)** | (0.020)** | (0.019)** | (0.047)**                                                        | (0.043)* | (0.036)   | (0.036)*  | (0.028)**        | (0.042)**      |
| AU                                                                   | 0.507                 | 0.808   | 0.917   | 0.954   | 0.968   | -0.409                                         | -0.109    | 0.037     | 0.051     | 0.135                                                            | -0.002   | 0.105     | 0.155     | 0.461            | 0.019          |
|                                                                      | (0.025)               | (0.019) | (0.015) | (0.015) | (0.013) | (0.029)**                                      | (0.024)** | (0.021)+  | (0.020)*  | (0.046)**                                                        | (0.044)  | (0.037)** | (0.036)** | (0.028)**        | (0.042)        |
| CA                                                                   | 0.421                 | 0.723   | 0.857   | 0.909   | 0.939   | -0.436                                         | -0.134    | 0.052     | 0.083     | 0.162                                                            | 0.023    | 0.090     | 0.123     | 0.518            | -0.038         |
|                                                                      | (0.044)               | (0.028) | (0.027) | (0.022) | (0.022) | (0.052)**                                      | (0.039)** | (0.035)   | (0.035)*  | (0.063)*                                                         | (0.054)  | (0.046)+  | (0.046)** | (0.049)**        | (0.058)        |

|                                                            | Means by income group |         |         |         |         | Gaps within countries (ref = Q3) [ $D_{c,q}$ ] |           |           |           | Difference in gaps between US and other countries [ $DD_{c,q}$ ] |          |           |           | Overall summary        |                      |
|------------------------------------------------------------|-----------------------|---------|---------|---------|---------|------------------------------------------------|-----------|-----------|-----------|------------------------------------------------------------------|----------|-----------|-----------|------------------------|----------------------|
|                                                            | Q1                    | Q2      | Q3      | Q4      | Q5      | Q1-Q3                                          | Q2-Q3     | Q4-Q3     | Q5-Q3     | Q1-Q3                                                            | Q2-Q3    | Q4-Q3     | Q5-Q3     | Gap w/in country Q5-Q1 | US diff in gap Q5-Q1 |
| <b>Mothers under age 20 at birth of child (proportion)</b> |                       |         |         |         |         |                                                |           |           |           |                                                                  |          |           |           |                        |                      |
| US                                                         | 0.226                 | 0.183   | 0.150   | 0.052   | 0.009   | 0.077                                          | 0.033     | -0.097    | -0.141    | -                                                                | -        | -         | -         | -0.217                 | -                    |
|                                                            | (0.019)               | (0.017) | (0.015) | (0.008) | (0.002) | (0.024)**                                      | (0.022)   | (0.017)** | (0.015)** |                                                                  |          |           |           | (0.019)**              |                      |
| UK                                                         | 0.201                 | 0.072   | 0.028   | 0.008   | 0.000   | 0.174                                          | 0.044     | -0.020    | -0.028    | -0.097                                                           | -0.011   | -0.077    | -0.113    | -0.201                 | -0.016               |
|                                                            | (0.014)               | (0.007) | (0.005) | (0.002) | (0.000) | (0.015)**                                      | (0.009)** | (0.005)** | (0.005)** | (0.028)**                                                        | (0.024)  | (0.018)** | (0.016)** | (0.014)**              | (0.023)              |
| AU                                                         | 0.081                 | 0.041   | 0.017   | 0.009   | 0.000   | 0.064                                          | 0.024     | -0.008    | -0.017    | 0.013                                                            | 0.009    | -0.089    | -0.124    | -0.081                 | -0.136               |
|                                                            | (0.014)               | (0.009) | (0.004) | (0.005) | (0.000) | (0.014)**                                      | (0.010)*  | (0.007)   | (0.004)** | (0.028)                                                          | (0.024)  | (0.018)** | (0.015)** | (0.014)**              | (0.023)**            |
| CA                                                         | -                     | -       | -       | -       | -       | -                                              | -         | -         | -         | -                                                                | -        | -         | -         | -                      | -                    |
| <b>Immigrant parent (proportion)</b>                       |                       |         |         |         |         |                                                |           |           |           |                                                                  |          |           |           |                        |                      |
| US                                                         | 0.312                 | 0.266   | 0.167   | 0.102   | 0.133   | 0.145                                          | 0.099     | -0.065    | -0.034    | -                                                                | -        | -         | -         | -0.179                 | -                    |
|                                                            | (0.031)               | (0.018) | (0.015) | (0.010) | (0.012) | (0.034)**                                      | (0.024)** | (0.018)** | (0.019)+  |                                                                  |          |           |           | (0.033)**              |                      |
| UK                                                         | 0.240                 | 0.147   | 0.117   | 0.118   | 0.163   | 0.122                                          | 0.030     | 0.001     | 0.045     | 0.023                                                            | 0.069    | -0.066    | -0.079    | -0.077                 | -0.102               |
|                                                            | (0.028)               | (0.012) | (0.011) | (0.009) | (0.014) | (0.031)**                                      | (0.016)+  | (0.014)   | (0.018)*  | (0.046)                                                          | (0.029)* | (0.023)** | (0.026)** | (0.032)*               | (0.045)*             |
| AU                                                         | 0.370                 | 0.342   | 0.310   | 0.353   | 0.406   | 0.059                                          | 0.032     | 0.043     | 0.096     | 0.086                                                            | 0.067    | -0.108    | -0.130    | 0.036                  | -0.216               |
|                                                            | (0.025)               | (0.018) | (0.015) | (0.018) | (0.020) | (0.029)*                                       | (0.023)   | (0.024)+  | (0.025)** | (0.045)+                                                         | (0.033)* | (0.030)** | (0.031)** | (0.032)                | (0.046)**            |
| CA                                                         | 0.252                 | 0.218   | 0.214   | 0.221   | 0.233   | 0.039                                          | 0.004     | 0.007     | 0.020     | 0.107                                                            | 0.095    | -0.072    | -0.054    | -0.019                 | -0.160               |
|                                                            | (0.047)               | (0.028) | (0.024) | (0.025) | (0.037) | (0.053)                                        | (0.037)   | (0.035)   | (0.044)   | (0.063)+                                                         | (0.044)* | (0.040)+  | (0.048)   | (0.059)                | (0.068)*             |

|                                                                            | Means by income group |         |         |         |         | Gaps within countries (ref = Q3) [ $D_{c,q}$ ] |           |           |           | Difference in gaps between US and other countries [ $DD_{c,q}$ ] |           |           |           | Overall summary        |                      |
|----------------------------------------------------------------------------|-----------------------|---------|---------|---------|---------|------------------------------------------------|-----------|-----------|-----------|------------------------------------------------------------------|-----------|-----------|-----------|------------------------|----------------------|
|                                                                            | Q1                    | Q2      | Q3      | Q4      | Q5      | Q1-Q3                                          | Q2-Q3     | Q4-Q3     | Q5-Q3     | Q1-Q3                                                            | Q2-Q3     | Q4-Q3     | Q5-Q3     | Gap w/in country Q5-Q1 | US diff in gap Q5-Q1 |
| <b>Average maternal weekly work hours at child's age 5 (all)</b>           |                       |         |         |         |         |                                                |           |           |           |                                                                  |           |           |           |                        |                      |
| US                                                                         | 18.128                | 24.622  | 27.193  | 27.755  | 25.226  | -9.065                                         | -2.571    | 0.561     | -1.967    | -                                                                | -         | -         | -         | 7.098                  | -                    |
|                                                                            | (0.839)               | (0.774) | (0.759) | (0.803) | (0.723) | (1.131)**                                      | (1.084)*  | (1.105)   | (1.048)+  |                                                                  |           |           |           | (1.107)**              |                      |
| UK                                                                         | 3.196                 | 10.645  | 16.539  | 19.010  | 22.338  | -13.343                                        | -5.895    | 2.471     | 5.799     | 4.278                                                            | 3.323     | -1.910    | -7.766    | 19.142                 | -12.043              |
|                                                                            | (0.301)               | (0.435) | (0.393) | (0.387) | (0.665) | (0.495)**                                      | (0.586)** | (0.551)** | (0.772)** | (1.235)**                                                        | (1.232)** | (1.235)   | (1.302)** | (0.730)**              | (1.326)**            |
| AU                                                                         | 5.876                 | 10.481  | 15.658  | 17.759  | 21.016  | -9.782                                         | -5.177    | 2.101     | 5.358     | 0.717                                                            | 2.606     | -1.539    | -7.325    | 15.140                 | -8.042               |
|                                                                            | (0.680)               | (0.596) | (0.507) | (0.598) | (0.778) | (0.848)**                                      | (0.782)** | (0.784)** | (0.929)** | (1.414)                                                          | (1.337)+  | (1.355)   | (1.400)** | (1.034)**              | (1.515)**            |
| CA                                                                         | 12.093                | 17.884  | 22.872  | 29.316  | 28.818  | -10.779                                        | -4.988    | 6.444     | 5.945     | 1.714                                                            | 2.417     | -5.883    | -7.912    | 16.725                 | -9.627               |
|                                                                            | (1.318)               | (1.004) | (0.905) | (0.708) | (1.444) | (1.599)**                                      | (1.352)** | (1.149)** | (1.704)** | (1.958)                                                          | (1.733)   | (1.594)** | (2.001)** | (1.955)**              | (2.246)**            |
| <b>Mothers with a paid job at child's age 5 (proportion)</b>               |                       |         |         |         |         |                                                |           |           |           |                                                                  |           |           |           |                        |                      |
| US                                                                         | 0.496                 | 0.678   | 0.738   | 0.779   | 0.713   | -0.242                                         | -0.060    | 0.041     | -0.025    | -                                                                | -         | -         | -         | 0.217                  | -                    |
|                                                                            | (0.028)               | (0.019) | (0.018) | (0.018) | (0.018) | (0.034)**                                      | (0.026)*  | (0.025)   | (0.025)   |                                                                  |           |           |           | (0.034)**              |                      |
| UK                                                                         | 0.161                 | 0.444   | 0.687   | 0.760   | 0.769   | -0.526                                         | -0.243    | 0.073     | 0.082     | 0.284                                                            | 0.183     | -0.033    | -0.107    | 0.608                  | -0.391               |
|                                                                            | (0.010)               | (0.012) | (0.013) | (0.011) | (0.018) | (0.017)**                                      | (0.018)** | (0.017)** | (0.022)** | (0.038)**                                                        | (0.031)** | (0.031)   | (0.034)** | (0.021)**              | (0.039)**            |
| AU                                                                         | 0.270                 | 0.473   | 0.658   | 0.706   | 0.757   | -0.388                                         | -0.185    | 0.048     | 0.099     | 0.146                                                            | 0.125     | -0.008    | -0.124    | 0.487                  | -0.270               |
|                                                                            | (0.017)               | (0.017) | (0.014) | (0.015) | (0.019) | (0.022)**                                      | (0.022)** | (0.021)*  | (0.024)** | (0.040)**                                                        | (0.034)** | (0.033)   | (0.035)** | (0.025)**              | (0.042)**            |
| CA                                                                         | 0.369                 | 0.600   | 0.738   | 0.881   | 0.850   | -0.370                                         | -0.138    | 0.142     | 0.112     | 0.127                                                            | 0.078     | -0.102    | -0.137    | 0.481                  | -0.264               |
|                                                                            | (0.039)               | (0.026) | (0.022) | (0.015) | (0.035) | (0.044)**                                      | (0.034)** | (0.026)** | (0.041)** | (0.056)*                                                         | (0.043)+  | (0.037)** | (0.048)** | (0.052)**              | (0.062)**            |
| <b>Average maternal weekly work hours at child's age 5 (employed only)</b> |                       |         |         |         |         |                                                |           |           |           |                                                                  |           |           |           |                        |                      |
| US                                                                         | 36.563                | 36.319  | 36.833  | 35.636  | 35.377  | -0.270                                         | -0.514    | -1.198    | -1.456    | -                                                                | -         | -         | -         | -1.186                 | -                    |
|                                                                            | (0.583)               | (0.644) | (0.586) | (0.646) | (0.574) | (0.827)                                        | (0.871)   | (0.872)   | (0.820)+  |                                                                  |           |           |           | (0.818)                |                      |
| UK                                                                         | 19.857                | 23.969  | 24.073  | 25.000  | 29.040  | -4.215                                         | -0.104    | 0.927     | 4.967     | 3.945                                                            | -0.410    | -2.125    | -6.423    | 9.182                  | -10.368              |
|                                                                            | (0.722)               | (0.587) | (0.355) | (0.344) | (0.554) | (0.805)**                                      | (0.686)   | (0.494)+  | (0.658)** | (1.154)**                                                        | (1.109)   | (1.002)*  | (1.052)** | (0.910)**              | (1.224)**            |
| AU                                                                         | 21.798                | 22.162  | 23.802  | 25.149  | 27.770  | -2.004                                         | -1.640    | 1.348     | 3.969     | 1.734                                                            | 1.126     | -2.545    | -5.425    | 5.973                  | -7.159               |
|                                                                            | (1.258)               | (0.785) | (0.525) | (0.600) | (0.724) | (1.363)                                        | (0.944)+  | (0.797)+  | (0.894)** | (1.594)                                                          | (1.284)   | (1.182)*  | (1.214)** | (1.451)**              | (1.666)**            |
| CA                                                                         | 32.814                | 29.803  | 30.984  | 33.290  | 33.913  | 1.830                                          | -1.180    | 2.306     | 2.930     | -2.101                                                           | 0.667     | -3.504    | -4.386    | 1.099                  | -2.285               |
|                                                                            | (1.760)               | (1.031) | (0.813) | (0.563) | (1.013) | (1.939)                                        | (1.313)   | (0.989)*  | (1.299)*  | (2.108)                                                          | (1.576)   | (1.319)** | (1.537)** | (2.031)                | (2.190)              |

|                                                                       | Means by income group |                  |                  |                  |                  | Gaps within countries (ref = Q3) [ $D_{c,q}$ ] |                    |                   |                    | Difference in gaps between US and other countries [ $DD_{c,q}$ ] |                   |                   |                    | Overall summary        |                      |
|-----------------------------------------------------------------------|-----------------------|------------------|------------------|------------------|------------------|------------------------------------------------|--------------------|-------------------|--------------------|------------------------------------------------------------------|-------------------|-------------------|--------------------|------------------------|----------------------|
|                                                                       | Q1                    | Q2               | Q3               | Q4               | Q5               | Q1-Q3                                          | Q2-Q3              | Q4-Q3             | Q5-Q3              | Q1-Q3                                                            | Q2-Q3             | Q4-Q3             | Q5-Q3              | Gap w/in country Q5-Q1 | US diff in gap Q5-Q1 |
| <b>Children in center-based care before school entry (proportion)</b> |                       |                  |                  |                  |                  |                                                |                    |                   |                    |                                                                  |                   |                   |                    |                        |                      |
| US                                                                    | 0.624<br>(0.039)      | 0.645<br>(0.033) | 0.621<br>(0.025) | 0.712<br>(0.031) | 0.829<br>(0.027) | 0.003<br>(0.046)                               | 0.024<br>(0.041)   | 0.091<br>(0.040)* | 0.208<br>(0.037)** | -                                                                | -                 | -                 | -                  | 0.205<br>(0.047)**     | -                    |
| UK                                                                    | 0.906<br>(0.029)      | 0.932<br>(0.023) | 0.933<br>(0.017) | 0.941<br>(0.016) | 0.921<br>(0.021) | -0.027<br>(0.033)                              | -0.001<br>(0.029)  | 0.008<br>(0.023)  | -0.012<br>(0.027)  | 0.030<br>(0.057)                                                 | 0.025<br>(0.050)  | 0.083<br>(0.046)+ | 0.220<br>(0.046)** | 0.015<br>(0.036)       | 0.190<br>(0.059)**   |
| AU                                                                    | 0.883<br>(0.028)      | 0.944<br>(0.019) | 0.954<br>(0.018) | 0.977<br>(0.022) | 0.979<br>(0.033) | -0.071<br>(0.033)*                             | -0.010<br>(0.026)  | 0.023<br>(0.028)  | 0.024<br>(0.038)   | 0.074<br>(0.057)                                                 | 0.034<br>(0.048)  | 0.068<br>(0.049)  | 0.184<br>(0.053)** | 0.096<br>(0.043)*      | 0.110<br>(0.064)+    |
| CA                                                                    | 0.399<br>(0.054)      | 0.483<br>(0.045) | 0.596<br>(0.043) | 0.625<br>(0.047) | 0.695<br>(0.069) | -0.197<br>(0.069)**                            | -0.113<br>(0.062)+ | 0.029<br>(0.064)  | 0.099<br>(0.082)   | 0.200<br>(0.083)*                                                | 0.137<br>(0.075)+ | 0.062<br>(0.075)  | 0.109<br>(0.090)   | 0.296<br>(0.088)**     | -0.091<br>(0.100)    |

Notes: Standard errors in parentheses. + significant at 10% level, \* significant at 5% level, \*\* at 1% level. Estimates weighted using longitudinal survey weights. Canadian numbers for teenage motherhood suppressed due to small cell sizes.
